# Supplementary material
Source: PubMed Central journal article supplement (PMC4328746)

A

| Accession | Description                                                                                                            | ΣCoverage | Σ# Unique Peptides | Exp1: K6Q(H) | Exp2: K6Q(L) | Average (K6Q/K6R) | # AAs | MW [kDa] |
|-----------|------------------------------------------------------------------------------------------------------------------------|-----------|--------------------|--------------|--------------|-------------------|-------|----------|
| P29966    | Myristoylated alanine-rich C-kinase substrate OS=Homo sapiens GN=MARCKS PE=1 SV=4 - [MARCKS_HUMAN]                     | 47.89     | 9                  | 9.841        | 0.089        | 10.534            | 332   | 31.5     |
| Q9UG63    | ATP-binding cassette sub-family F member 2 OS=Homo sapiens GN=ABCF2 PE=1 SV=2 - [ABCF2_HUMAN]                          | 25.68     | 14                 | 11.281       | 0.168        | 8.617             | 623   | 71.2     |
| P09429    | High mobility group protein B1 OS=Homo sapiens GN=HMGB1 PE=1 SV=3 - [HMGB1_HUMAN]                                      | 22.33     | 3                  | 9.996        | 0.152        | 8.296             | 215   | 24.9     |
| Q15555    | Microtubule-associated protein RP/EB family member 2 OS=Homo sapiens GN=MAPRE2 PE=1 SV=1 - [MARE2_HUMAN]               | 25.99     | 6                  | 8.546        | 0.173        | 7.158             | 327   | 37       |
| Q6L8Q7    | 2',5'-phosphodiesterase 12 OS=Homo sapiens GN=PDE12 PE=1 SV=2 - [PDE12_HUMAN]                                          | 37.93     | 18                 | 7.407        | 0.177        | 6.526             | 609   | 67.3     |
| P50579    | Methionine aminopeptidase 2 OS=Homo sapiens GN=METAP2 PE=1 SV=1 - [AMPMP2_HUMAN]                                       | 24.48     | 7                  | 7.185        | 0.179        | 6.386             | 478   | 52.9     |
| Q9NR29    | Lymphoid-specific helicase OS=Homo sapiens GN=HELLS PE=1 SV=1 - [HELLS_HUMAN]                                          | 15.27     | 12                 | 5.814        | 0.145        | 6.354             | 838   | 97       |
| Q9Y220    | Suppressor of G2 allele of SKP1 homolog OS=Homo sapiens GN=SUGT1 PE=1 SV=3 - [SUGT1_HUMAN]                             | 33.97     | 9                  | 7.23         | 0.187        | 6.285             | 365   | 41       |
| Q96I24    | Far upstream element-binding protein 3 OS=Homo sapiens GN=FUBP3 PE=1 SV=2 - [FUBP3_HUMAN]                              | 23.78     | 7                  | 4.861        | 0.149        | 5.797             | 572   | 61.6     |
| O76021    | Ribosomal L1 domain-containing protein 1 OS=Homo sapiens GN=RSL1D1 PE=1 SV=3 - [RL1D1_HUMAN]                           | 22.24     | 8                  | 5.512        | 0.165        | 5.78              | 490   | 54.9     |
| Q13428    | Treacle protein OS=Homo sapiens GN=TCOF1 PE=1 SV=3 - [TCOF_HUMAN]                                                      | 4.23      | 5                  | 3.302        | 0.151        | 4.961             | 1488  | 152      |
| Q9Y450    | HBS1-like protein OS=Homo sapiens GN=HBS1L PE=1 SV=1 - [HBS1L_HUMAN]                                                   | 18.42     | 8                  | 4.53         | 0.252        | 4.249             | 684   | 75.4     |
| Q96H79    | Zinc finger CCCH-type antiviral protein 1-like OS=Homo sapiens GN=ZC3HAV1L PE=1 SV=2 - [ZCCHL_HUMAN]                   | 32.67     | 5                  | 3.771        | 0.216        | 4.197             | 300   | 32.9     |
| P49790    | Nuclear pore complex protein Nup153 OS=Homo sapiens GN=NUP153 PE=1 SV=2 - [NU153_HUMAN]                                | 15.39     | 15                 | 3.818        | 0.232        | 4.064             | 1475  | 153.8    |
| Q4VCS5    | Angiotensin OS=Homo sapiens GN=AMOT PE=1 SV=1 - [AMOT_HUMAN]                                                           | 31.46     | 27                 | 3.219        | 0.212        | 3.971             | 1084  | 118      |
| Q9Y5B9    | FACT complex subunit SPT16 OS=Homo sapiens GN=SUPT16H PE=1 SV=1 - [SP16H_HUMAN]                                        | 28.37     | 23                 | 3.207        | 0.224        | 3.839             | 1047  | 119.8    |
| Q9Y263    | Phospholipase A-2-activating protein OS=Homo sapiens GN=PLAA PE=1 SV=2 - [PLAP_HUMAN]                                  | 32.83     | 18                 | 3.708        | 0.286        | 3.602             | 795   | 87.1     |
| Q8NI27    | THO complex subunit 2 OS=Homo sapiens GN=THOC2 PE=1 SV=2 - [THOC2_HUMAN]                                               | 8.6       | 11                 | 3.794        | 0.299        | 3.57              | 1593  | 182.7    |
| Q16543    | Hsp90 co-chaperone Cdc37 OS=Homo sapiens GN=CDC37 PE=1 SV=1 - [CDC37_HUMAN]                                            | 23.54     | 8                  | 4.551        | 0.389        | 3.561             | 378   | 44.4     |
| P62263    | 40S ribosomal protein S14 OS=Homo sapiens GN=RPS14 PE=1 SV=3 - [RS14_HUMAN]                                            | 33.11     | 7                  | 3.356        | 0.27         | 3.532             | 151   | 16.3     |
| Q14157    | Ubiquitin-associated protein 2-like OS=Homo sapiens GN=UBAP2L PE=1 SV=2 - [UBP2L_HUMAN]                                | 15.36     | 9                  | 2.706        | 0.236        | 3.471             | 1087  | 114.5    |
| Q12789    | General transcription factor 3C polypeptide 1 OS=Homo sapiens GN=GTF3C1 PE=1 SV=4 - [TF3C1_HUMAN]                      | 14.7      | 26                 | 3.834        | 0.334        | 3.413             | 2109  | 238.7    |
| P53985    | Monocarboxylate transporter 1 OS=Homo sapiens GN=SLC16A1 PE=1 SV=3 - [MOT1_HUMAN]                                      | 14.8      | 8                  | 2.963        | 0.27         | 3.335             | 500   | 53.9     |
| P49915    | GMP synthase [glutamine-hydrolyzing] OS=Homo sapiens GN=GMPS PE=1 SV=1 - [GUAA_HUMAN]                                  | 44.59     | 23                 | 3.89         | 0.412        | 3.16              | 693   | 76.7     |
| Q9UHB9    | Signal recognition particle 68 kDa protein OS=Homo sapiens GN=SRP68 PE=1 SV=2 - [SRP68_HUMAN]                          | 28.71     | 16                 | 3.177        | 0.325        | 3.126             | 627   | 70.7     |
| O43491    | Band 4.1-like protein 2 OS=Homo sapiens GN=EPB41L2 PE=1 SV=1 - [E41L2_HUMAN]                                           | 35.52     | 24                 | 3.687        | 0.39         | 3.126             | 1005  | 112.5    |
| Q96QK1    | Vacuolar protein sorting-associated protein 35 OS=Homo sapiens GN=VPS35 PE=1 SV=2 - [VPS35_HUMAN]                      | 23.62     | 13                 | 3.67         | 0.417        | 3.036             | 796   | 91.6     |
| Q9UJA5    | tRNA (adenine(58)-N(1))-methyltransferase non-catalytic subunit TRM6 OS=Homo sapiens GN=TRMT6 PE=1 SV=1 - [TRM6_HUMAN] | 12.47     | 4                  | 3.238        | 0.354        | 3.03              | 497   | 55.8     |
| P46060    | Ran GTPase-activating protein 1 OS=Homo sapiens GN=RANGAP1 PE=1 SV=1 - [RAGP1_HUMAN]                                   | 39.18     | 16                 | 3.062        | 0.337        | 3.016             | 587   | 63.5     |
| P26639    | Threonine-tRNA ligase, cytoplasmic OS=Homo sapiens GN=TARS PE=1 SV=3 - [SYTC_HUMAN]                                    | 26.56     | 18                 | 3.113        | 0.348        | 2.993             | 723   | 83.4     |
| Q00796    | Sorbitol dehydrogenase OS=Homo sapiens GN=SORD PE=1 SV=4 - [DHSO_HUMAN]                                                | 15.41     | 4                  | 3.241        | 0.384        | 2.922             | 357   | 38.3     |
| Q92769    | Histone deacetylase 2 OS=Homo sapiens GN=HDAC2 PE=1 SV=2 - [HDAC2_HUMAN]                                               | 32.17     | 8                  | 3.14         | 0.371        | 2.917             | 488   | 55.3     |
| P23527    | Histone H2B type 1-O OS=Homo sapiens GN=HIST1H2BO PE=1 SV=3 - [H2B1O_HUMAN]                                            | 53.97     | 7                  | 2.973        | 0.368        | 2.844             | 126   | 13.9     |
| Q14839    | Chromodomain-helicase-DNA-binding protein 4 OS=Homo sapiens GN=CHD4 PE=1 SV=2 - [CHD4_HUMAN]                           | 22.28     | 32                 | 2.446        | 0.316        | 2.807             | 1912  | 217.9    |
| Q00325    | Phosphate carrier protein, mitochondrial OS=Homo sapiens GN=SLC25A3 PE=1 SV=2 - [MPCP_HUMAN]                           | 23.76     | 9                  | 2.457        | 0.317        | 2.804             | 362   | 40.1     |
| Q13547    | Histone deacetylase 1 OS=Homo sapiens GN=HDAC1 PE=1 SV=1 - [HDAC1_HUMAN]                                               | 30.29     | 7                  | 3.168        | 0.411        | 2.799             | 482   | 55.1     |
| P26358    | DNA (cytosine-5)-methyltransferase 1 OS=Homo sapiens GN=DNMT1 PE=1 SV=2 - [DNMT1_HUMAN]                                | 16.89     | 23                 | 2.925        | 0.375        | 2.797             | 1616  | 183      |
| O76094    | Signal recognition particle 72 kDa protein OS=Homo sapiens GN=SRP72 PE=1 SV=3 - [SRP72_HUMAN]                          | 31        | 16                 | 2.844        | 0.372        | 2.766             | 671   | 74.6     |
| P52701    | DNA mismatch repair protein Msh6 OS=Homo sapiens GN=MSH6 PE=1 SV=2 - [MSH6_HUMAN]                                      | 19.04     | 20                 | 2.955        | 0.4          | 2.728             | 1360  | 152.7    |
| P43246    | DNA mismatch repair protein Msh2 OS=Homo sapiens GN=MSH2 PE=1 SV=1 - [MSH2_HUMAN]                                      | 31.69     | 22                 | 2.839        | 0.391        | 2.699             | 934   | 104.7    |
| P62805    | Histone H4 OS=Homo sapiens GN=HIST1H4A PE=1 SV=2 - [H4_HUMAN]                                                          | 50.49     | 5                  | 2.623        | 0.36         | 2.698             | 103   | 11.4     |
| Q9Y295    | Developmentally-regulated GTP-binding protein 1 OS=Homo sapiens GN=DRG1 PE=1 SV=1 - [DRG1_HUMAN]                       | 37.6      | 9                  | 2.491        | 0.345        | 2.696             | 367   | 40.5     |
| Q9P287    | BRCA2 and CDKN1A-interacting protein OS=Homo sapiens GN=BCCIP PE=1 SV=1 - [BCCIP_HUMAN]                                | 16.24     | 3                  | 3.395        | 0.506        | 2.686             | 314   | 36       |
| P83881    | 60S ribosomal protein L36a OS=Homo sapiens GN=RPL36A PE=1 SV=2 - [RL36A_HUMAN]                                         | 17.92     | 3                  | 2.35         | 0.335        | 2.667             | 106   | 12.4     |
| Q02952    | A-kinase anchor protein 12 OS=Homo sapiens GN=AKAP12 PE=1 SV=4 - [AKA12_HUMAN]                                         | 18.24     | 18                 | 2.335        | 0.346        | 2.612             | 1782  | 191.4    |
| Q13895    | Bystin OS=Homo sapiens GN=BYSL PE=1 SV=3 - [BYST_HUMAN]                                                                | 21.51     | 6                  | 2.613        | 0.394        | 2.577             | 437   | 49.6     |

● Histone H2B

● Histone/chromatin-interacting proteins

B

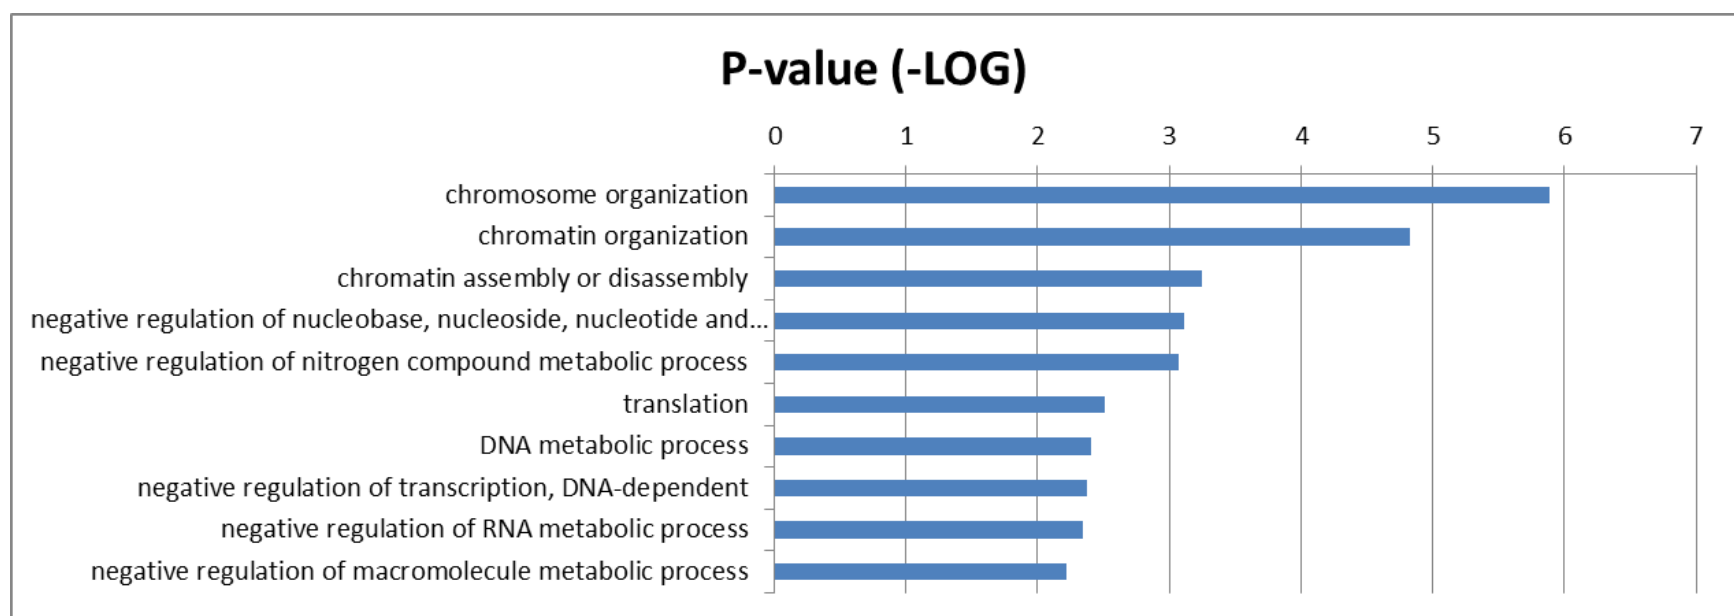

Supplement: embr0016-0192-sd9.pdf [file embr0016-0192-sd9.pdf]
