# Supplementary material
Source: PubMed Central journal article supplement (PMC4328746)
Supplement: embr0016-0192-sd2.pdf [file embr0016-0192-sd2.pdf]

A

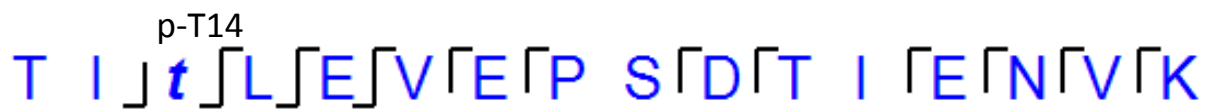Precursor MS =  $m/z$  934.4504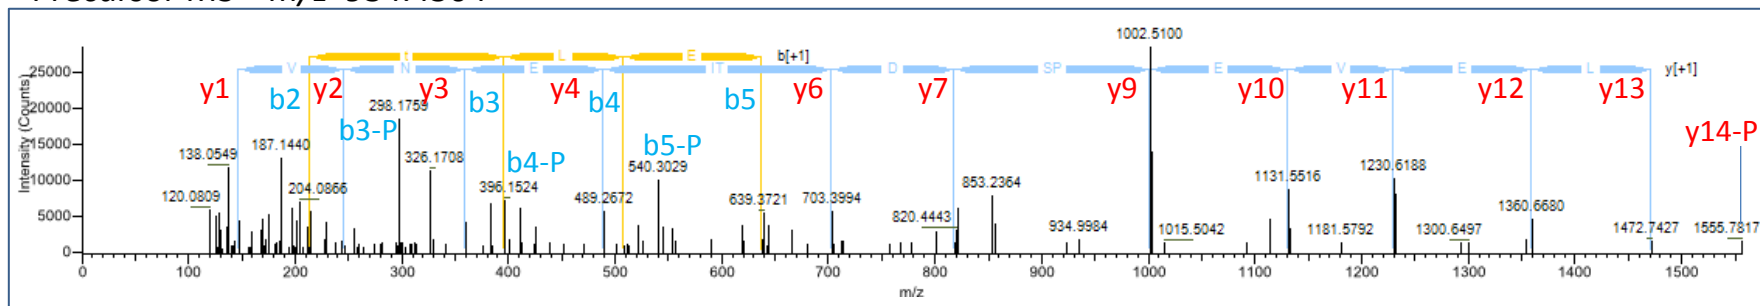

B

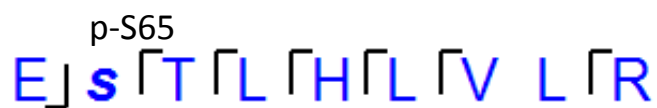Precursor MS =  $m/z$  574.2971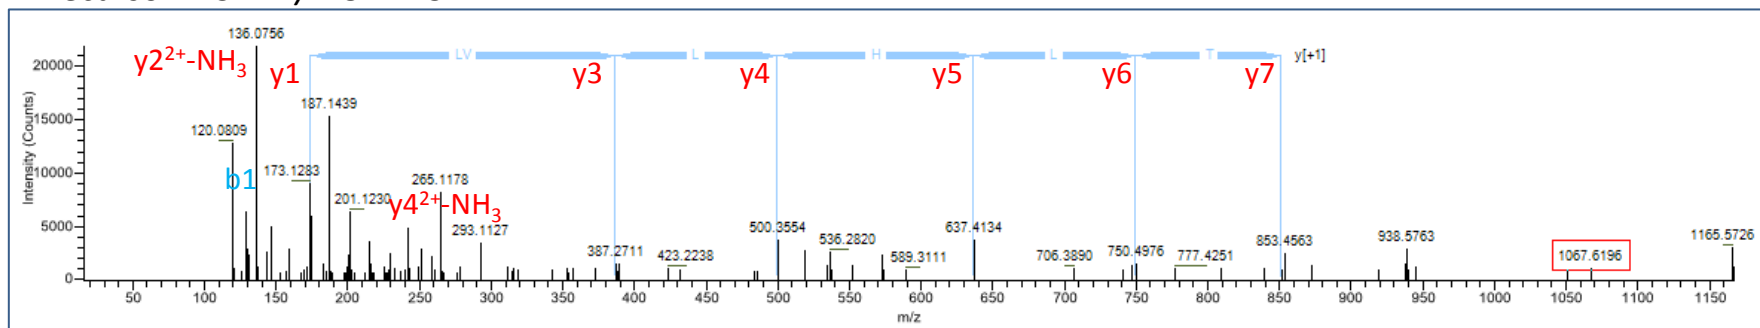

C

| Sequence           | PSM Ambiguity | Modifications             | Activation Type | Charge | $m/z$ [Da] | MH+ [Da]   | $\Delta M$ [ppm] | RT [min] | Confidence |
|--------------------|---------------|---------------------------|-----------------|--------|------------|------------|------------------|----------|------------|
| MQIFVKTLTGK        | Unambiguous   | K6(Acetyl)                | HCD             | 2      | 654.37323  | 1307.73918 | -0.04            | 64.38    | High       |
| LIFAGKQLEDGR       | Unambiguous   | K6(Acetyl)                | HCD             | 2      | 694.88000  | 1388.75273 | -0.42            | 54.54    | High       |
| TLSDYNIQKESTLHLVLR | Unambiguous   | K9(Acetyl)                | HCD             | 3      | 724.72681  | 2172.16587 | -0.05            | 71.32    | High       |
| TItLEVEPSDTIENVK   | Unambiguous   | T3(Phospho)               | HCD             | 2      | 934.45038  | 1867.89348 | -0.12            | 67.55    | High       |
| EsTLHLVLR          | Unambiguous   | S2(Phospho)               | HCD             | 2      | 574.29712  | 1147.58696 | -0.16            | 56.95    | High       |
| mQIFVKTLTGK        | Unambiguous   | M1(Oxidation); K6(Acetyl) | HCD             | 2      | 662.37097  | 1323.73467 | 0.39             | 54.35    | High       |
