# Supplementary material
Source: PubMed Central journal article supplement (PMC4328746)

Fig. 2A-B

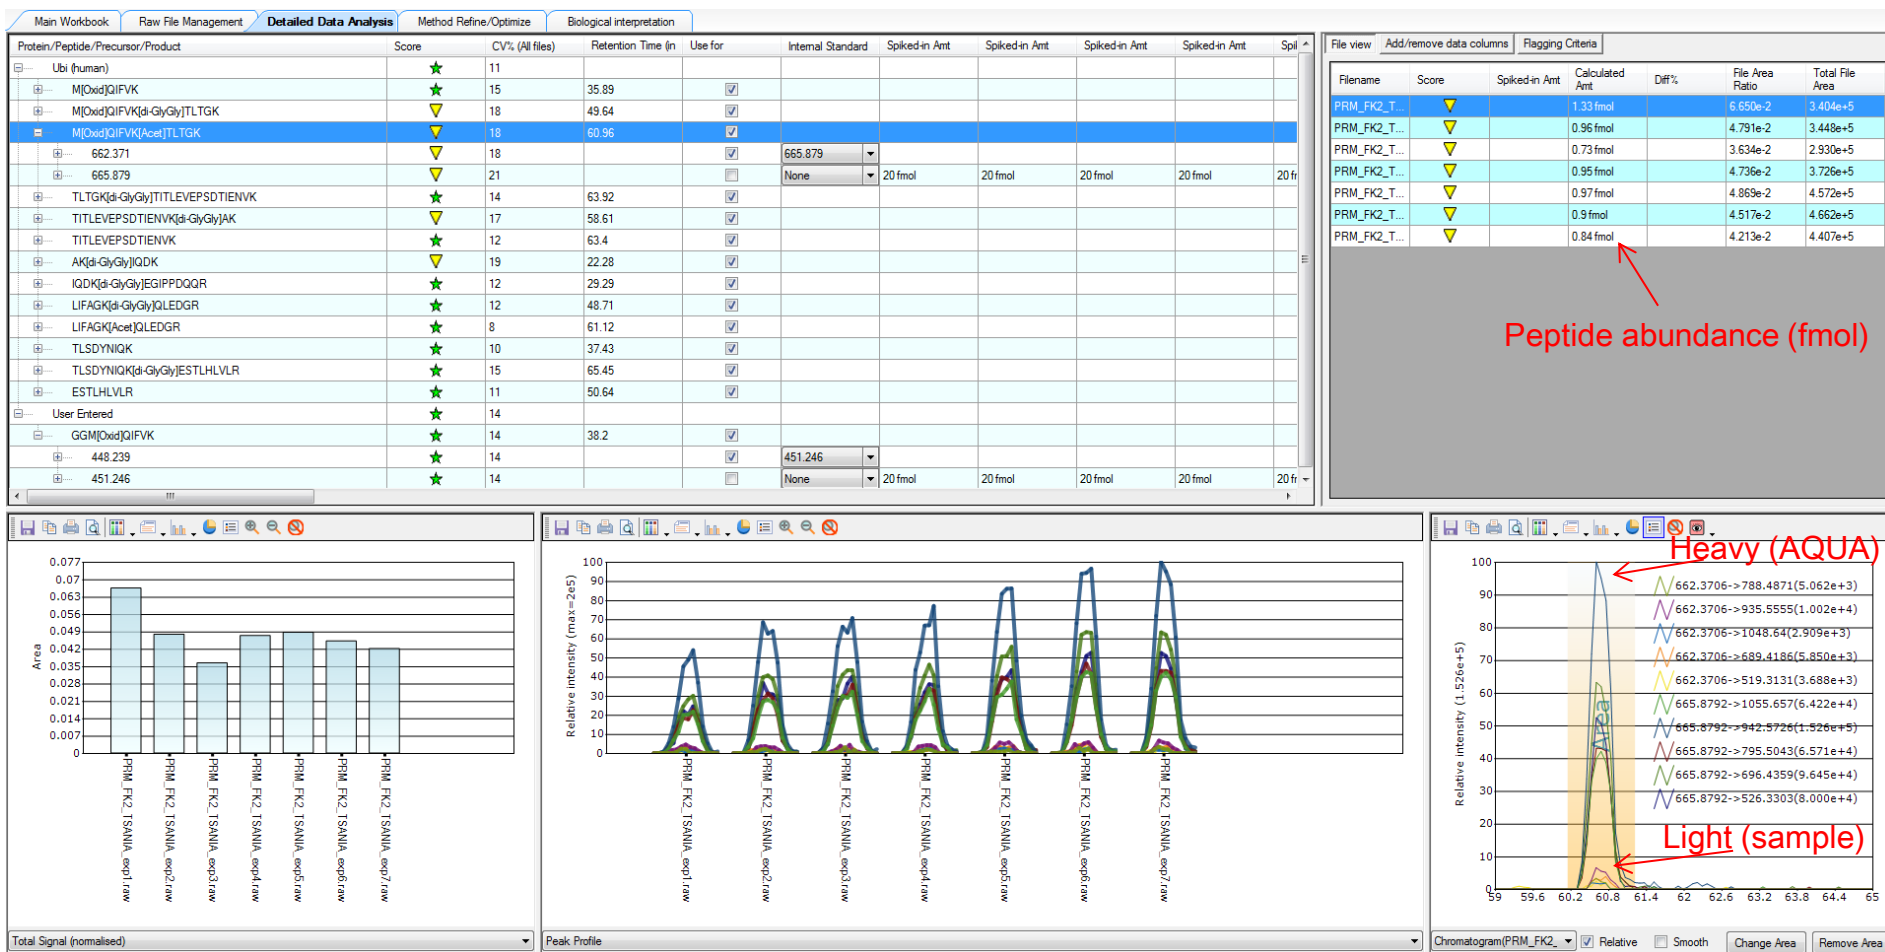

Fig. 2C

anti-Ach4 (reprobe of Ach3K9)

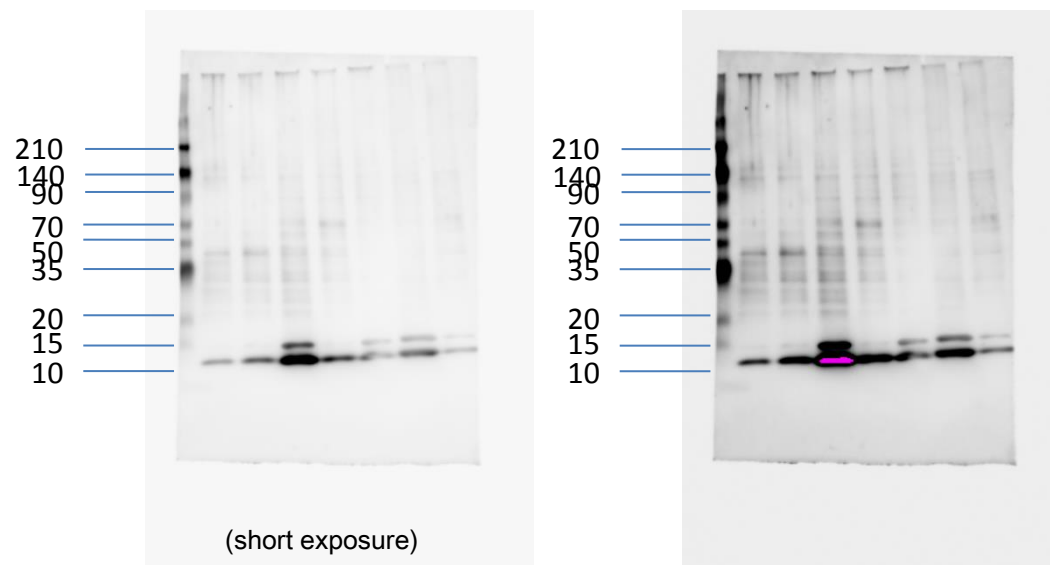

Anti-H3

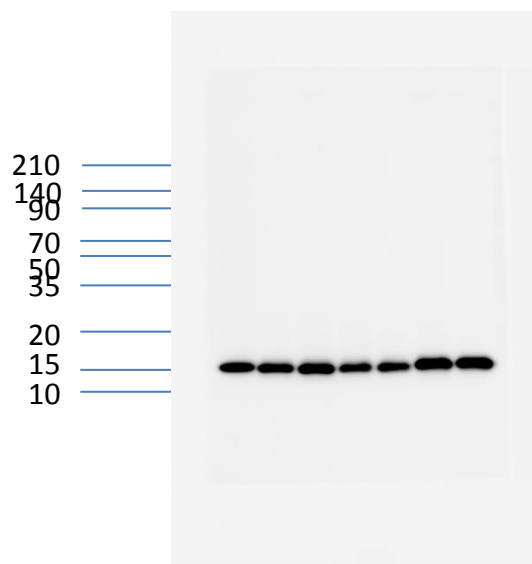

Anti-H3K9Ac

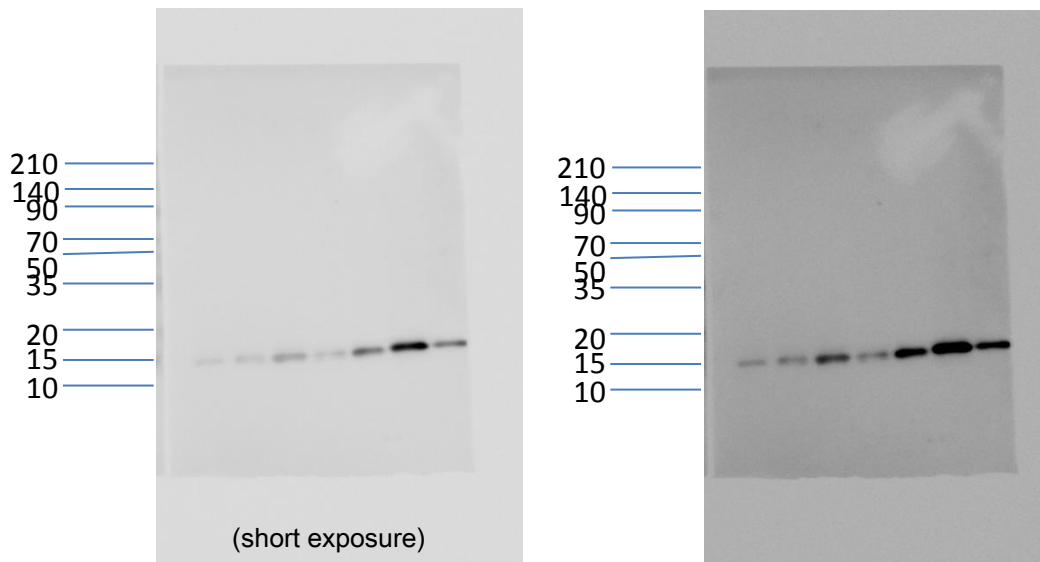

Supplement: embr0016-0192-sd17.pdf [file embr0016-0192-sd17.pdf]

Fig. 3B

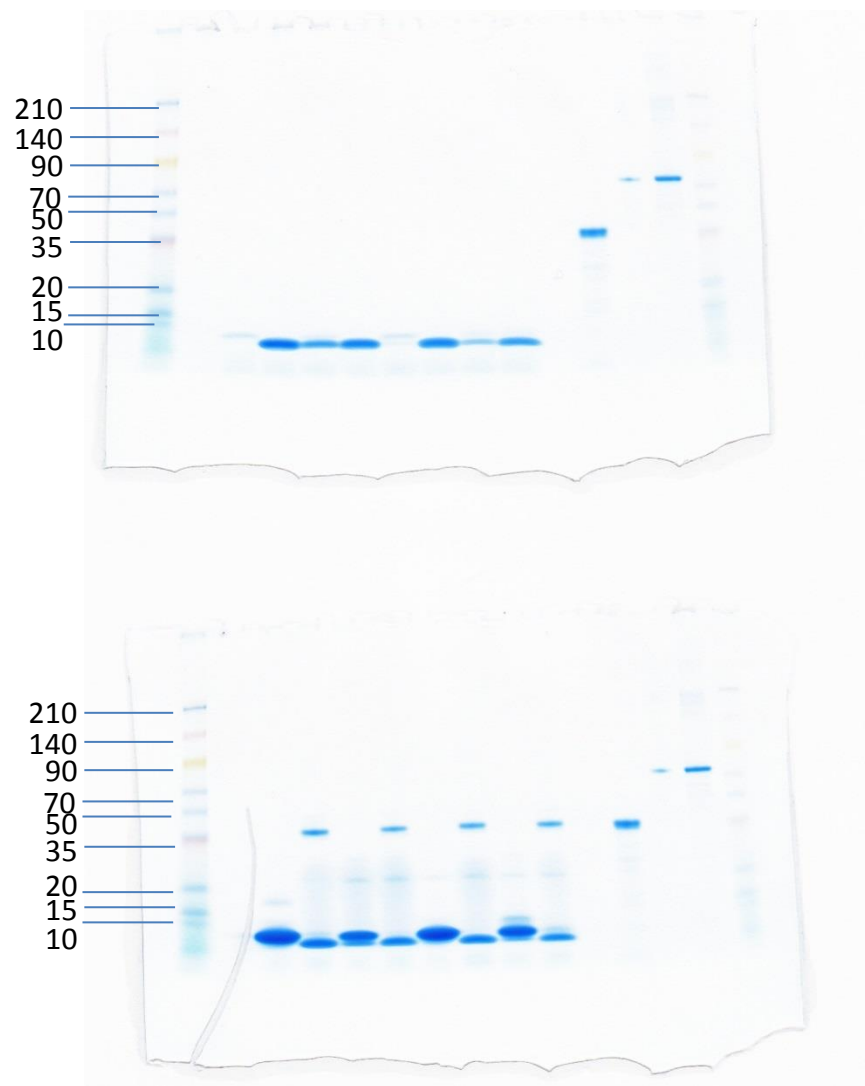

Fig. 3C

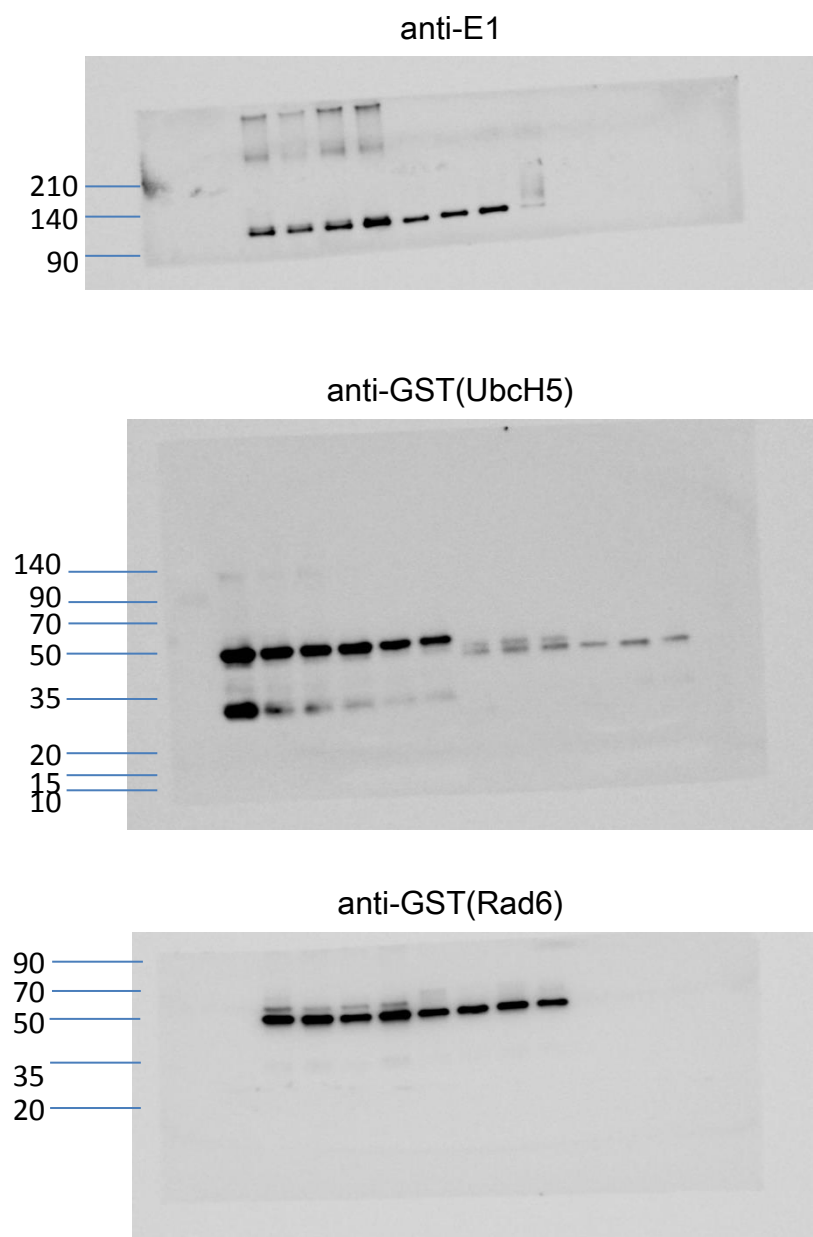

Fig. 3D

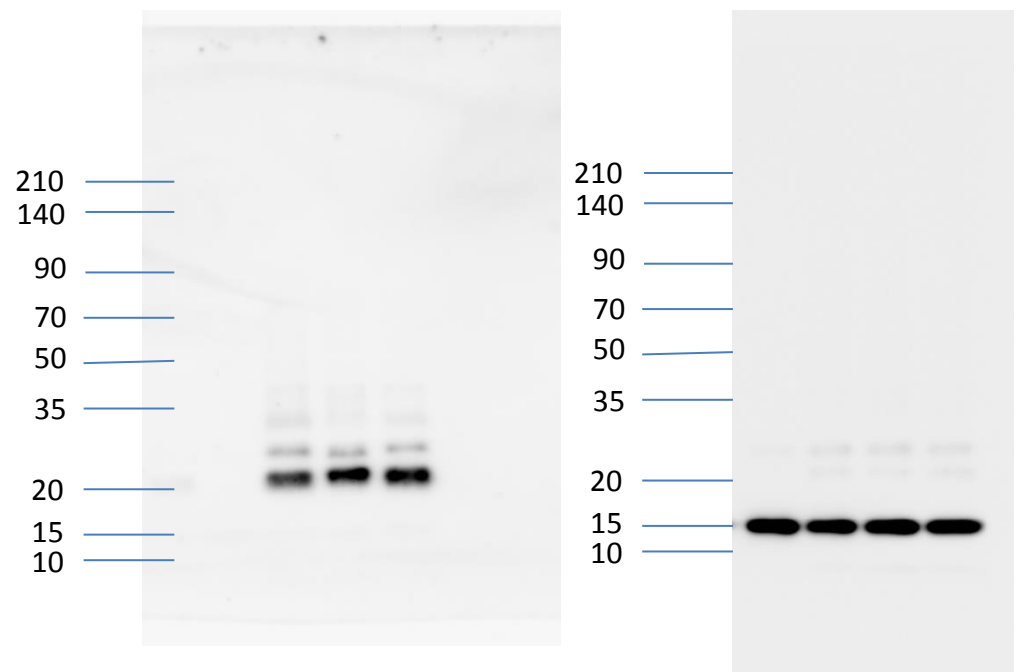

Supplement: embr0016-0192-sd18.pdf [file embr0016-0192-sd18.pdf]
